# Supplementary material for: Photodegradation of methyl orange and photoinactivation of bacteria by visible light activation of persulphate using a tris(2,2′-bipyridyl)ruthenium(II) complex
Source: Royal Society of Chemistry journal article supplement (doi:10.1039/c2pp25316j), 2012-11-14
Supplement: c2pp25316j.pdf [file c2pp25316j.pdf]

**Supporting Information:**

**“Photodegradation of methyl orange and photoinactivation of bacteria by visible light activation of persulphate using tris(2,2'-bipyridyl)ruthenium(II) complex”**

*Gokulakrishnan Subramanian, Priyadarshini Parakh, Halan Prakash\**

Department of Chemistry, Birla Institute of Technology and Science, Pilani, K.K. Birla  
Goa Campus, NH17B, Zuarinagar, Goa, India, 403 726.

**\*Corresponding author**

Dr. Halan Prakash, Ph.D

halanprakash@goa.bits-pilani.ac.in, halanprakash@gmail.com

Tel; 0832-2580344, Fax; 0832-2557033

Website; <http://universe.bits-pilani.ac.in/goa/halanprakash/profile>

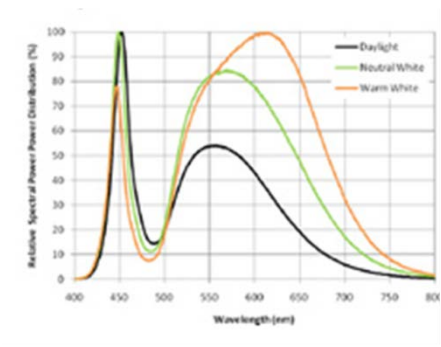

**Fig. SI 1.** (A) Emission spectrum of Warm white LED bulb (orange line) used for irradiation. <http://www.kwalityindia.com/main.html>

| Colour                | Luminous Flux(lm)<br>*(mW)<br>@350mA |     | Luminous Flux(lm)<br>*(mW)<br>@700mA |     | Forward voltage<br>Vf(v)<br>@350mA | Forward voltage<br>Vf(v)<br>@700mA | Typ.CRI<br>Color<br>Rendering<br>Index | CCT/λp           | 201/2 |
|-----------------------|--------------------------------------|-----|--------------------------------------|-----|------------------------------------|------------------------------------|----------------------------------------|------------------|-------|
|                       | min                                  | typ | min                                  | typ |                                    |                                    |                                        |                  |       |
| WW<br>(warm<br>white) | 50                                   | 60  | 85                                   | 102 | 2.8-3.8                            | 3.0-4.1                            | 80                                     | 2600K-<br>23700K | 125   |

Temperature coefficient of Vf : -3 mV/°C W,G,B,-2 mV/°C R&A

Thermal Resistance junction to lead: 10°C/W

\*CCT- correlated color temperature

Source : <http://www.kwalityindia.com/index.html>

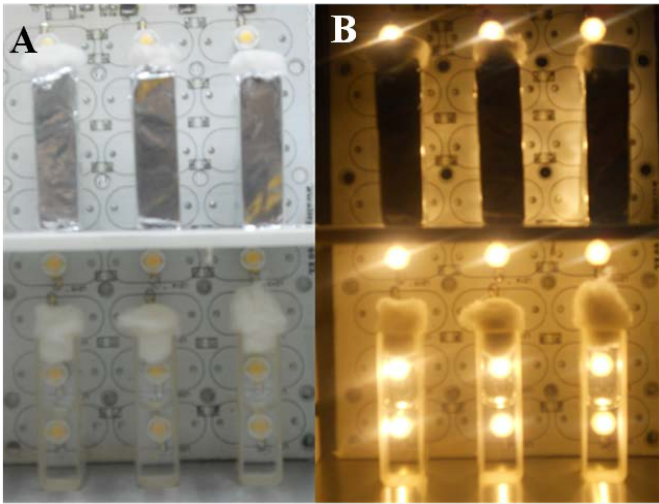

**Fig. SI 2.** Photograph of experimental set up of photolysis. Quartz cuvettes containing the reaction mixture are placed at appropriate distance from the array. For dark controls, the

reaction vessels are covered with aluminium foil. (A) LED bulbs are switched off (B) LED bulbs are switched on.

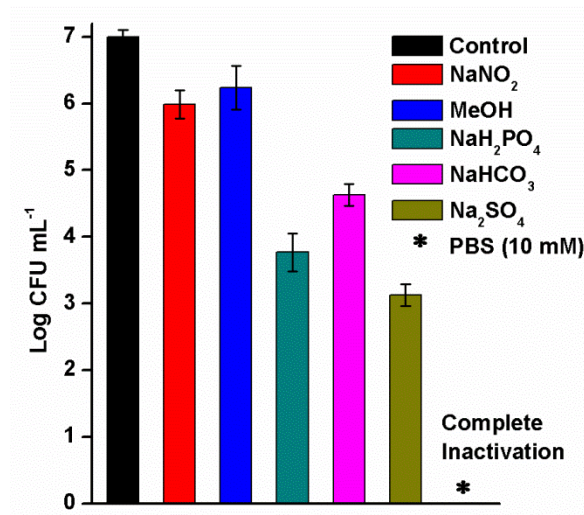

**Fig. SI 3.** (A) Cell viability of *E.coli* in the presence of radical scavengers and inorganic salts. Methanol (0.1 M), and Sodium nitrite (0.02M) Na<sub>2</sub>HPO<sub>4</sub>(0.1 M), Na<sub>2</sub>SO<sub>4</sub>(0.1 M) and NaHCO<sub>3</sub>(0.1 M) *E.coli* concentration =  $\sim 10^7$  cfu mL<sup>-1</sup>, [persulphate] = 2mM, [complex1] = 1 $\mu$ M, Light dosage = 513 Jcm<sup>-2</sup>.

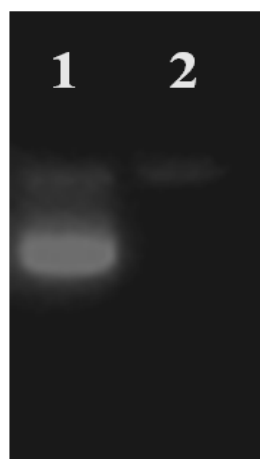

**Fig. SI 4.** Photograph of Agarose gel showing the extracted chromosomal DNA of *E. coli* treated with complex1 and persulphate in dark (control) Lane1, and in presence of light (Lane

2) *E.coli* concentration =  $\sim 10^7$  cfu mL<sup>-1</sup>, [complex1] = 1  $\mu$ M, [persulphate] = 2mM, Light dosage = 513 Jcm<sup>-2</sup>.

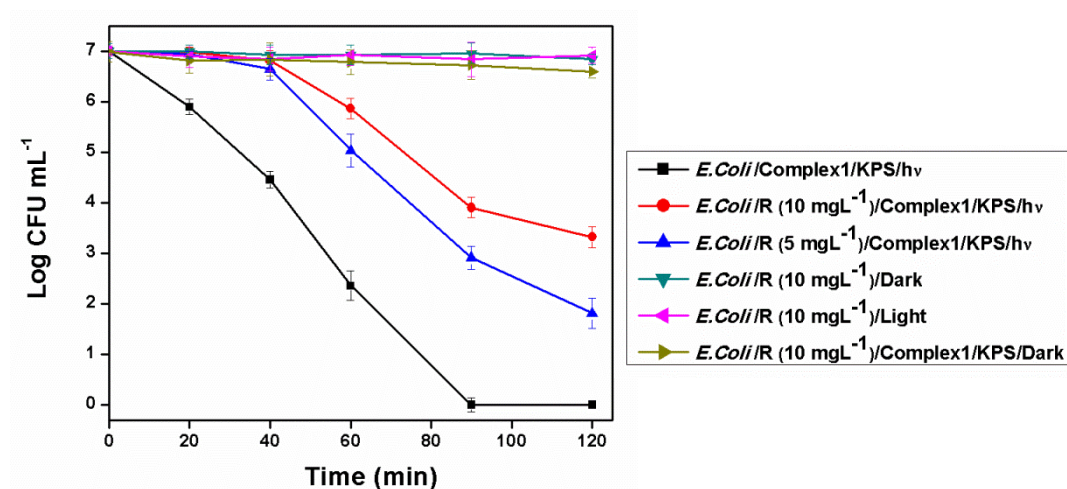

**Fig. SI 5.** Cell viability vs Time plot for photoinactivation of *E.coli* in absence, and presence of resorcinol (5 & 10 mg L<sup>-1</sup>). *E.coli* concentration =  $\sim 10^7$  CFU mL<sup>-1</sup>, [complex1] = 1  $\mu$ M, [persulphate] = 2 mM, Light dosage = 684 Jcm<sup>-2</sup>.

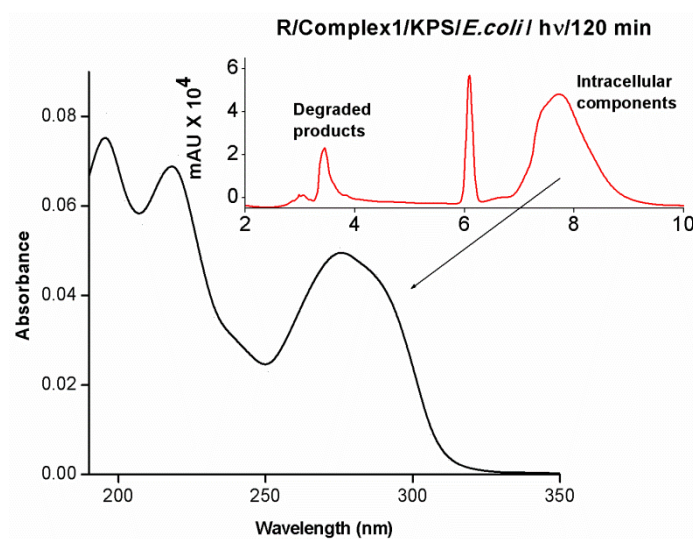

**Fig. SI 6.** Absorption spectrum of the peak at RT 7-8 min corresponding to the chromatogram of *E.coli* cells photolysed with complex1 and persulphate in the presence of resorcinol. Inset shows the HPLC profile. *E.coli* concentration =  $\sim 10^7$  cfu mL<sup>-1</sup>, [complex1] = 1  $\mu$ M, [persulphate] = 2mM, Resorcinol = 10 mgL<sup>-1</sup>. Light dosage = 684 Jcm<sup>-2</sup>.
